# Supplementary material for: Improving Model Calibrations in a Changing World: Controlling for Nonstationarity After Mega Disturbance Reduces Hydrological Uncertainty
Source: Copernicus journal article supplement (doi:10.5194/egusphere-2025-1877), 2025-05-21
Supplement: Supplementary file [file egusphere-2025-1877-AC2-supplement.pdf]

# Improving Model Calibrations in a Changing World: Controlling for Nonstationarity After Mega Disturbance Reduces Hydrological Uncertainty

Elijah N. Boardman, Gabrielle F. S. Boisramé, Mark S. Wigmosta, Robert K. Shriver, Adrian A. Harpold

## Response to Reviewer Comment RC2

We greatly appreciate the reviewer's helpful comments on this manuscript, which we will address in a revision. Our comments are interspersed into the review in blue.

I understand the idea that meteorological data are uncertain and can significantly influence model outputs. However, the parameter range used for correcting meteorological biases ( $\pm 25\%$  for precipitation,  $\pm 4^\circ\text{C}$  for temperature) appears very large. Are there existing studies or evidence supporting this magnitude of potential meteorological bias specifically within this basin? My concern is that using such broad correction ranges might allow the hydrological model to artificially add or remove water to better match streamflow observations, which themselves are uncertain due to reconstruction processes, thereby compensating for potentially missing or poorly represented processes.

We agree that the potential compensations between uncertain weather, uncertain models, and uncertain streamflow leads to a quandary. However, we believe that our study proposes a uniquely robust method to untangle this problem through a Bayesian uncertainty framework. By simultaneously propagating uncertainty in the data and model (through calibration of biases along with other parameters), we explore the full range of potential compensations, thereby robustly propagating the resultant uncertainty. This approach constrains uncertainty in the target variable (extra water from fire) without requiring an unrealistically precise confidence level in the unmeasured mountain weather.

We have substantially expanded our justification of this approach as follows:

While most of these parameters are widely recognized as suitable for calibration (Cuo et al. 2011, Du et al. 2014), precipitation and temperature biases are less frequently included in the calibration of distributed process-based models despite considerable uncertainty in gridded meteorological data. Among gridded meteorological datasets, there is mean relative difference of 21% for annual precipitation in our study watershed (Henn et al. 2018), and misestimation of large storms can lead to yearly biases of about 20% across the Sierra Nevada (Lundquist et al. 2015). Similarly, different meteorological datasets have mean air temperature differences as large as  $\pm 8^\circ\text{C}$  in the Sierra Nevada, and basin-average uncertainty is lower but still on the order of several  $^\circ\text{C}$  (Schreiner-McGraw and Ajami 2022). Compensation between unknown errors in the meteorology data, model structure and calibration, and reconstructed streamflow can potentially contribute to spurious goodness-of-fit metrics with hidden physical deficiencies. Moreover, we expect that interactions between meteorological uncertainty and parameter equifinality may contribute to the overall uncertainty of disturbance simulations (Fig. 1), but this

uncertainty would remain hidden if meteorological biases were assumed to be negligible. Because perfectly resolving the weather data with infinite precision is not feasible across a large, rugged mountain region, the robust approach is to propagate meteorological uncertainty into our final results (the post-fire hydrological change in this case), so that our conclusions include the quantified uncertainty caused by the model-data-calibration interaction. We view the combined meteorological data and hydrological model as a single inferential system, thereby acknowledging that the meteorological data themselves are based on various uncertain observations and empirical model assumptions (Abatzoglou 2013). In a Bayesian context, the goal of our calibration can be understood as sampling the probability of the streamflow and snow observations given a particular combination of model parameters and meteorological assumptions:  $P(\text{streamflow} + \text{snow} \mid \text{model} + \text{meteorology})$ . Because we lack a closed-form likelihood function for spatially distributed hydrological models like DHSVM, we estimate the unknown parameters of this whole weather-model system using an informal approximation based on traditional hydrological model calibration objective functions (Beven and Binley 1992).

Lundquist, J. D., Abel, M. R., Henn, B., Gutmann, E. D., Livneh, B., Dozier, J., & Neiman, P. (2015). High-Elevation Precipitation Patterns: Using Snow Measurements to Assess Daily Gridded Datasets across the Sierra Nevada, California. *Journal of Hydrometeorology*, 16(4), 1773–1792. <https://doi.org/10.1175/JHM-D-15-0019.1>

Henn, B., Newman, A. J., Livneh, B., Daly, C., & Lundquist, J. D. (2018). An assessment of differences in gridded precipitation datasets in complex terrain. *Journal of Hydrology*, 556, 1205–1219. <https://doi.org/10.1016/j.jhydrol.2017.03.008>

Schreiner-McGraw, A. P., & Ajami, H. (2022). Combined impacts of uncertainty in precipitation and air temperature on simulated mountain system recharge from an integrated hydrologic model. *Hydrology and Earth System Sciences*, 26(4), 1145–1164. <https://doi.org/10.5194/hess-26-1145-2022>

Additional added explanation in introduction:

As illustrated in Fig. 1, meteorological uncertainty (e.g., a precipitation bias) can interact with uncertain model parameterizations, contributing to uncertainty in the streamflow response to disturbance. Basin-scale meteorology data are highly uncertain in mountain regions (e.g., Lundquist et al. 2015, Henn et al. 2018, Schreiner-McGraw and Ajami 2022), and whatever assumptions we make about the meteorology may cause the model to compensate for inaccuracies with other calibrated parameters (Elsner et al. 2014). For example, assuming a larger precipitation bias correction may cause the model to simulate a larger ETTree component and a corresponding large post-fire change (Model 3 in Fig. 1), whereas a smaller precipitation bias correction could limit the predicted post-fire streamflow change since the pre-fire P-Q residual is smaller (Models 1-2 in Fig. 1). From a Bayesian perspective, we can treat the data and model as a combined inferential system, which enables us to constrain uncertainty in the interactions between uncertain meteorology and uncertain hydrology by generating suitable ensemble samples (Kavetski et al. 2003).

Kavetski, D., Franks, S. W., & Kuczera, G. (2003). Confronting input uncertainty in environmental modelling. In Q. Duan, H. V. Gupta, S. Sorooshian, A. N. Rousseau, & R.

Turcotte (Eds.), *Water Science and Application* (Vol. 6, pp. 49–68). American Geophysical Union. <https://doi.org/10.1029/WS006p0049>

Elsner, M. M., Gangopadhyay, S., Pruitt, T., Brekke, L. D., Mizukami, N., & Clark, M. P. (2014). How Does the Choice of Distributed Meteorological Data Affect Hydrologic Model Calibration and Streamflow Simulations? *Journal of Hydrometeorology*, 15(4), 1384–1403. <https://doi.org/10.1175/JHM-D-13-083.1>

The presence of a reservoir near the gauge station considerably disrupts natural streamflow patterns. The approach of reconstructing streamflow to remove these effects (naturalized flows) partially restores the basin's natural characteristics but leaves the "observed" data highly uncertain. Such uncertainty can significantly impact calibration experiments. Could you clarify the method used to reconstruct the streamflow? Specifically, does the reconstruction explicitly account for changes introduced by the 2020 Creek Fire disturbance?

We have clarified how the “reconstructed” streamflow is calculated based on the California DWR documentation as follows:

Streamflow is estimated at the outlet of Millerton Lake (Fig. 2) by reconstructing observations to remove the effects of artificial flow regulation (California Department of Water Resources 2024). Millerton Lake unimpaired outflows are estimated assuming sub-daily surface routing times by summing the daily change in storage, canal and dam releases, surface evaporation, and storage changes at eight smaller upstream reservoirs (Huang and Kadir 2016). Note that the reconstructed streamflow timeseries used in this study (called “full natural flow” by the California Data Exchange Center) is based on an explicit mass balance equation applied directly to the respective storage and flow measurements, not model output, unlike various other meanings of “natural flow” that are sometimes applied to California water datasets (Huang and Kadir 2016). The reconstructed streamflow timeseries (hereafter “observed streamflow”) constrains the actual effects of the Creek Fire (and other disturbances) because the reconstruction procedure is directly based on measurements at specific diversion, storage, and outflow points, which are themselves responsive to the basin hydrological conditions. Three objective functions are based on a cleaned version of this daily streamflow timeseries (spurious negative values during low-flow periods and other missing values are imputed).

Huang, G., & Kadir, T. (2016). *Estimates of Natural and Unimpaired Flows for the Central Valley of California: Water Years 1922-2014* (pp. 1–256). Department of Water Resources, Bay-Delta Office. <https://data.ca.gov/dataset/estimates-of-natural-and-unimpaired-flows-for-the-central-valley-of-california-wy-1922-2014>

In defining the “behavioral” parameter sets, thresholds were applied selectively to NSE, log NSE, yearly MAPE, and April-July MAPE, but notably not to the snow criteria. Could you elaborate on why snow metrics were excluded from this subjective filtering? Additionally, could you clarify whether these subjective thresholds are truly necessary or if the results would have differed significantly by simply selecting the 30 “best” members from the initial ensemble across all calibration metrics? A more detailed justification for choosing these thresholds would enhance transparency and reproducibility.

We have substantially expanded our explanation of the filtering process:

Narrowing the range of acceptable parameter sets requires case-by-case determination of what skill level is satisfactory for a particular watershed-model combination because a higher skill might be achieved in hydroclimates that are conceptually simpler to simulate. At the same time, it is necessary to retain enough parameter diversity to explore our research questions related to the interaction between equifinality and disturbance. Based on prior experience modeling with DHSVM in the Sierra Nevada (e.g., Boardman et al. 2025), we find that the best model skill we can generally achieve is around a daily NSE of approximately 0.8 or higher and yearly error of approximately 10% or lower. Any single criteria is insufficient for narrowing the parameter space to a reasonable fraction of the total calibration space. For example, over 30% of all tested parameter sets have daily NSE > 0.8 (none have NSE > 0.9), but some of these high-NSE parameter sets are clearly inferior, e.g., with yearly MAPE as high as 35%. Combining multiple thresholds, we find that 48 parameter sets qualify as “behavioral” by satisfying daily NSE > 0.8, daily log NSE > 0.8, yearly MAPE < 10%, April-July MAPE < 10%, and Pareto-efficiency across all objectives. We do not directly apply thresholds to the snow calibration metrics because the variability of these objective functions is already strongly constrained within the behavioral ensemble (e.g., the SWE RMSE coefficient of variation is 2% within the behavioral ensemble compared to 59% across all 600 parameter sets). Nevertheless, snow-based objective functions still constrain the behavioral ensemble because all behavioral parameter sets must be Pareto-efficient across all seven objectives.

If my understanding is correct, the 30 DHSVM parameter sets were derived from calibration experiments using dynamic vegetation only. Thus, comparing model performance under conditions for which it was explicitly calibrated (dynamic vegetation) against for which it was not calibrated (static vegetation conditions) might be unfair. To address this concern, would it be possible to conduct an additional calibration experiment using static vegetation maps? This would allow a more balanced and fair comparison, using these static-calibrated parameter sets as an appropriate benchmark against the dynamic-vegetation approach presented here.

The reviewer is correct about our calibration procedure. However, we are not primarily “comparing model performance,” but rather, predicting the real-world streamflow change that is attributable to the fire. The nuance here is that we do not expect the static vegetation model to accurately simulate post-fire streamflow, so there is no inherent unfairness in the model treatment. Rather, the static vegetation model is simply expected to represent an approximation of what streamflow might have resulted if there had been no fire.

Nevertheless, we appreciate the reviewer’s interest in seeing how a static-calibrated model would perform in a similar framework. Luckily, we have already performed a completely independent

second calibration experiment over the pre-fire period (2011-2020), which has mostly static vegetation with the exception of negligible disturbances on the order of a couple percent. We initially chose not to discuss this second calibration in the manuscript because it gave basically the same results, and we thought it was unnecessarily complicated to explain. However, we have now added the details about the second calibration. The primary result is contained in Supplemental Figure S7 (shown below).

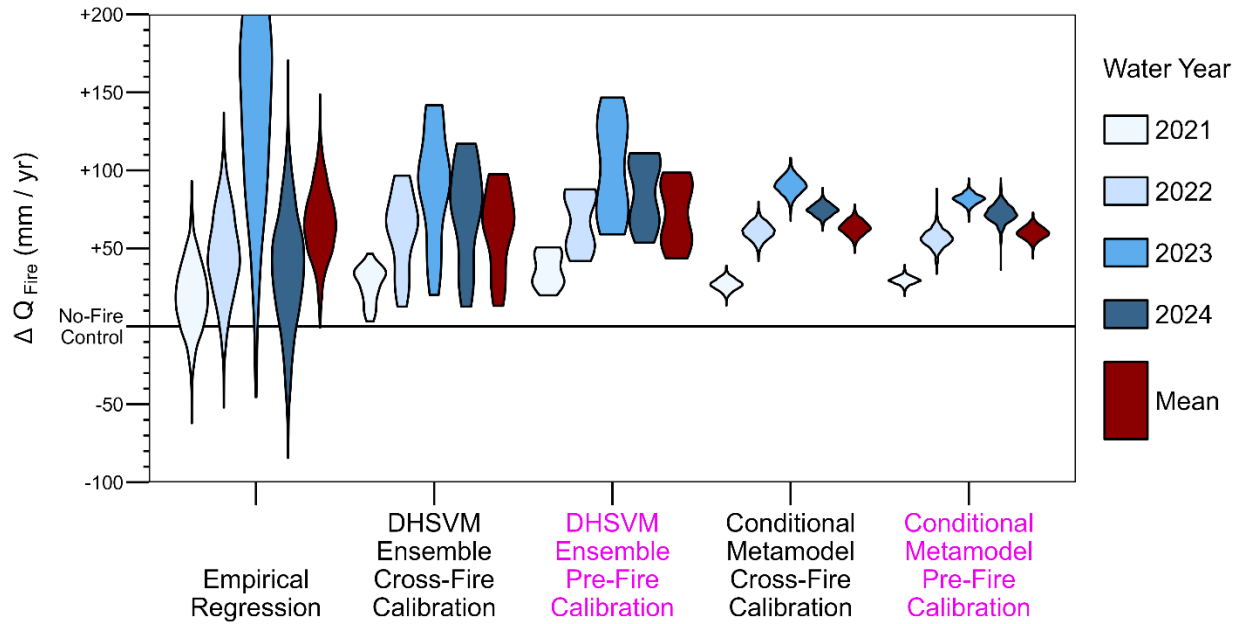

Figure S7: Comparison of pre-fire and cross-fire calibration results analogous to Fig. 6 in the main manuscript. The “cross-fire calibration” (black text labels) refers to the primary DHSVM behavioral ensemble (30 parameter sets) referenced throughout the main manuscript (calibrated over water years 2015-2024). The “pre-fire calibration” (magenta text labels) refers to an entirely separate behavioral ensemble (10 parameter sets) obtained using an identical Bayesian regression approach applied to a completely separate DHSVM calibration performed over water years 2011-2020, prior to the Creek Fire.

Importantly, both the pre-fire and cross-fire calibrations yield similar predictions of the post-fire streamflow change ( $\Delta Q_{\text{Fire}}$ ), both when considering either the raw ensemble of behavioral parameter sets or the conditional metamodel (Eq. 2).

Added text in methods:

We repeat our entire calibration procedure over the time period immediately before the fire (water years 2011-2020) to test whether similar results are obtained when the model is calibrated without foreknowledge of a mega disturbance. Unlike our primary calibration, which spans 6 years before the fire and 4 years after the fire, all 10 years of the “pre-fire calibration” have negligible change in the model vegetation maps. The pre-fire calibration is initialized with the same Latin hypercube sample of 320 random parameter sets, after which we perform six generations of multi-objective Bayesian optimization following the same procedures as the primary calibration discussed previously, and we select behavioral parameter sets using the same

objective function criteria. By performing two completely separate and identical calibration procedures on different time periods, we ensure that there is no cross-contamination of information between the two calibrations, i.e., the pre-fire calibration is independent and does not “know” about the other calibration.

Added text in results:

The independent pre-fire calibration (end of Sect. 2.2) yields similar predictions of the post-fire streamflow change (Supplemental Figure S7). When applied to behavioral parameter sets from the pre-fire calibration, the conditional metamodel predicts a 90% credible interval of +9% to +12% for the total post-fire streamflow change, which is remarkably close to the independent estimate of +10% to +12% using the cross-fire (2015-2024) calibration. The conditional metamodel based on the pre-fire calibration reduces uncertainty in the total post-fire streamflow (90% confidence interval) by 82% compared to the empirical regression and 74% compared to the pre-fire behavioral DHSVM ensemble, which is again similar to the analogous 80% and 82% reductions (respectively) achieved by the cross-fire calibration metamodel. Regardless of whether DHSVM is calibrated pre- and post-fire, or only pre-fire, the conditional metamodel provides consistent predictions of the additional streamflow attributable to the Creek Fire ( $\Delta Q_{\text{Fire}}$ ).

Added text in discussion:

The consistency of the metamodel results between two independent calibrations (pre-fire and cross-fire) suggests that our framework is robust to modeling decisions and random temporal variability, further strengthening confidence in the results.

I'm not sure what that means. Could you define this term in more detail?

We added a sentence immediately after the first use of “counterfactual” to clarify its meaning:

In this context, a “counterfactual” refers to a hypothetical scenario in which a particular disturbance did not happen, so comparing the actual post-disturbance behavior to the counterfactual scenarios enables attribution of disturbance effects.

I would suggest to define what a megafire is or just use large wildfire.

Clarified as follows:

In this context, a megafire is any wildfire in excess of 400 km<sup>2</sup> (Ayars et al. 2023).

Ayars, J., Kramer, H. A., & Jones, G. M. (2023). The 2020 to 2021 California megafires and their impacts on wildlife habitat. *Proceedings of the National Academy of Sciences*, 120(48), e2312909120. <https://doi.org/10.1073/pnas.2312909120>

Given Figure 2, it's not really above, the lake is included, which is a very strong control on hydrological modelling.

Agreed, and we have reworded this to say “...above the outlet of Millerton Lake.”



I think it would be interesting to refer to Figure S4 when you introduce this Table too. By the way, parameters have a different name between Table 1 and Figure S4. Please check consistency in parameter names.

We have added a reference to Figure S4 when Table 1 is introduced. The parameter names have also been updated for consistency in Figure S1 and S4, though some need to be abbreviated to fit on the plots.

By the way I was not able to access the data with the reference provided to have more information about this station. Could you update the hyperlink?

The link has been updated:

[https://cdec.water.ca.gov/dynamicapp/staMeta?station\\_id=SBF](https://cdec.water.ca.gov/dynamicapp/staMeta?station_id=SBF)

Out of curiosity, does the 'best' member, i.e. the 'best' parameter set, achieve BestValue on all criteria or does it show some 'worst' values (even if here it is not really worst since it is already filter to achieve a threshold) on some criteria? If it's the first case, that's good news; if it's the second, that show a trade-off, so it would be interesting to know what's stopping the model with the 'best' parameter set from top-performing for everything.

There is definitely not a single “best” parameter set. Rather, there is a Pareto frontier between each of the objective functions, so some models do slightly better at one objective while having worse values on other objectives. This is emphasized in our discussion of overfitting to NSE and Log NSE, which would result in outlying models (Supplemental Figure S6).

In terms of “what’s preventing one model from being best at everything,” we can’t really say, because the high-dimensional interactions between parameters and objective functions is very complex (e.g., Supplemental Figure S1). Rather, this Pareto-efficient behavior is what we generally expect from any high-dimensional multi-objective optimization procedure, hydrological or otherwise. One way of thinking about it is that the edges of the Pareto frontier (best values on any one objective) are basically overfitting to noise in the data, which is illustrated by our Supplemental Figure S6.

We added the following to the text:

As expected for any high-dimensional multi-objective optimization problem, there is no single “best” parameter set. Rather, the behavioral parameter sets constitute a Pareto frontier, with some achieving slightly better at one objective and worse at another. One way of understanding this phenomenon is that the parameter sets with the absolute highest values for any single objective are overfitting to noise in the data, while parameters that perform reasonably well at a variety of objectives are intuitively more likely to capture meaningful hydrological information.

Is it included in meteorological inputs or is it calculated through DHSVM. In both case, how is PET calculated?

This is clarified as follows in the text:

Note that the annual PET used in the empirical water balance model is pre-calculated as part of the gridMET dataset (Abatzoglou 2013) from Penman-Monteith reference evapotranspiration, but PET is calculated separately within the DHSVM evapotranspiration module (Wigmosta et al. 1994), similarly using a Penman-Monteith implementation.

This seems arbitrary; I suggest to add a clear definition of what satisfactory means in your study if you want to use this terminology.

We clarified that we consider these simulations visually “satisfactory” in addition to the metrics:

The behavioral ensemble of 30 calibrated DHSVM parameter sets all reproduce observed streamflow hydrographs with a satisfactory visual match to peak flow and low flow magnitudes, interannual variability, and seasonal timing (Table 2, Fig. 3).

We also added a comparison to a similar study:

Additionally, the post-fire daily NSE of at least 0.80 achieved by all behavioral DHSVM parameter sets is substantially higher than the post-fire daily NSE of -0.13 to 0.60 achieved by a different distributed hydrological model (with dynamic vegetation and other fire-aware updates) after a megafire in other Sierra Nevada sub-watersheds (Abolafia-Rosenzweig et al. 2024).

I think it is important to introduce the validation procedure in the methodology section (period, criteria used, ...)

Agreed—this has been added:

We validate the performance of the selected parameter sets by simulating the 10 year period prior to the calibration period, i.e., water years 2005-2014. We calculate the same objective functions over this validation period to test the validity of the calibration on out-of-sample time periods.

A benchmark would be very helpful here to know whether the model was already capable of this without the dynamic aspect of the vegetation maps.

Agreed—this has been added:

Without the vegetation map updates, the behavioral ensemble performs significantly worse on the post-fire period, but streamflow skill is still reasonably high: the mean NSE is lower by 0.06 in the no-fire control scenario ( $p < 0.001$ , Welch one-sample t-test) and the mean log NSE is lower by 0.02 ( $p < 0.001$ ). Furthermore, the no-fire control scenario yields a mean post-fire bias between -17% and -9% (static vegetation systematically underestimates post-fire streamflow), while in dynamic vegetation mode, the mean post-fire bias varies between -9% and +6% (Supplemental Figure S3).



This is an interesting result. I think it is important to provide an explanation to support this result (greater exposure to sunlight, changes in albedo, increased wind exposure, etc.). Do you know what is causing 2023 to be particularly affected?

We added this information:

Because our post-fire implementation only changes the vegetation maps (no change to modeled soil or snow albedo), the prediction of earlier snowmelt runoff is primarily a result of increased energy reaching the snowpack due to reduced canopy shading. This snowmelt timing effect is most noticeable in the 2023 water year, which was a year with extremely high snow accumulation (Marshall et al. 2024).

Marshall, A. M., Abatzoglou, J. T., Rahimi, S., Lettenmaier, D. P., & Hall, A. (2024). California's 2023 snow deluge: Contextualizing an extreme snow year against future climate change. *Proceedings of the National Academy of Sciences*, 121(20), e2320600121. <https://doi.org/10.1073/pnas.2320600121>

I'm not sure I fully understood. The stationary sub-ensemble is a subset of the full behavioral ensemble, right? In that case, how can it achieve a higher maximum score?

This has been clarified to explain that the sub-ensemble has better SWE error compared to the highest-NSE parameter set, not the full behavioral ensemble:

Compared to the full behavioral ensemble, the stationary sub-ensemble has slightly sub-optimal hydrograph fit (NSE 0.80-0.85 vs. 0.89 max), but better SWE volume error compared to the highest-NSE parameter set (MAPE of 18-27% across 30 ASO surveys vs. 32% for the highest-NSE parameter set).
